# Supplementary figures and images for: Domestic cat hepadnavirus associated with hepatopathy in cats: A retrospective study
Source: PubMed Central journal article supplement — J Vet Intern Med. 2022 Aug 24;36(5):1648–59. doi: 10.1111/jvim.16525 (PMC9511090; doi:10.1111/jvim.16525), 2022-08-24

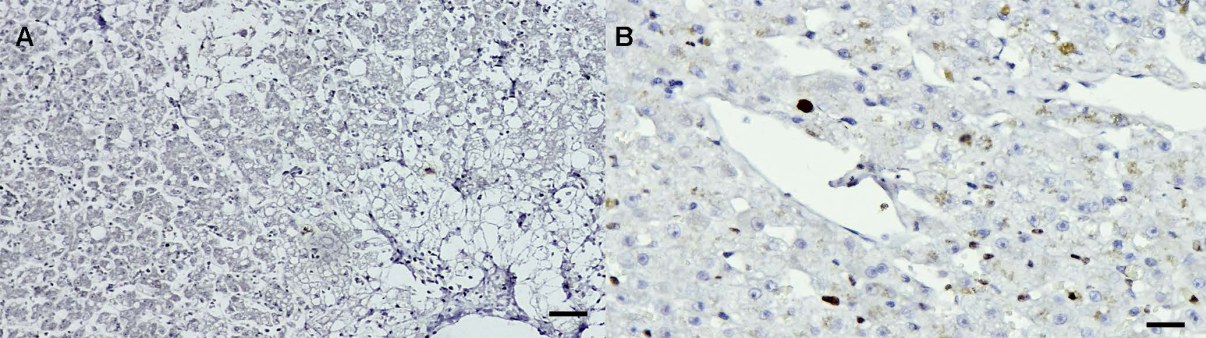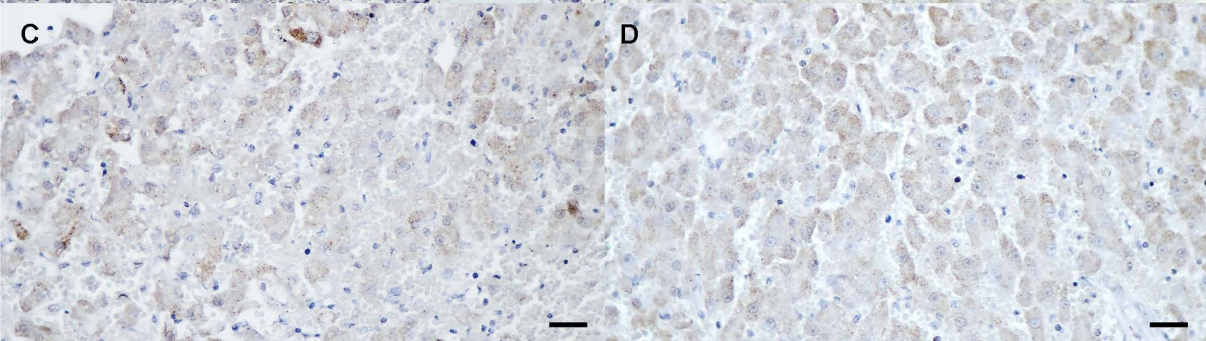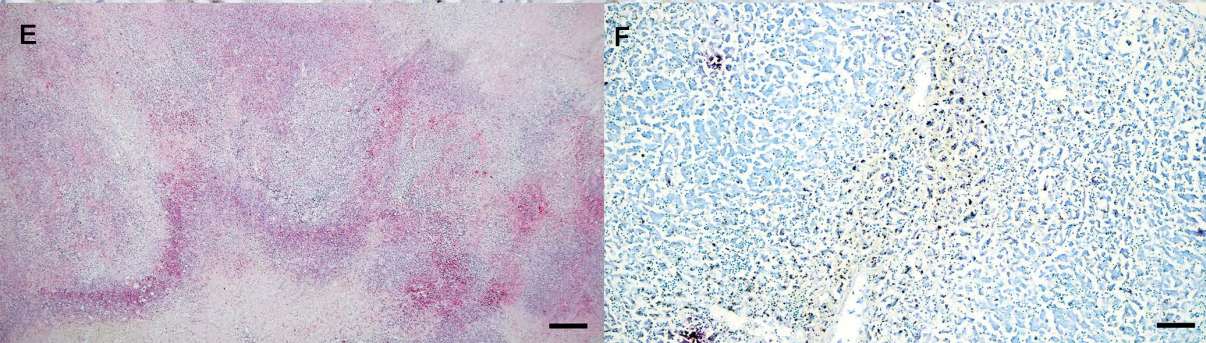

Supplement: JVIM-36-1648-s001.pdf [file JVIM-36-1648-s001.pdf]
